# Supplementary material
Source: PubMed Central journal article supplement (PMC2840681)
Supplement: en.2009-0657_1.pdf [file en.2009-0657_1.pdf]

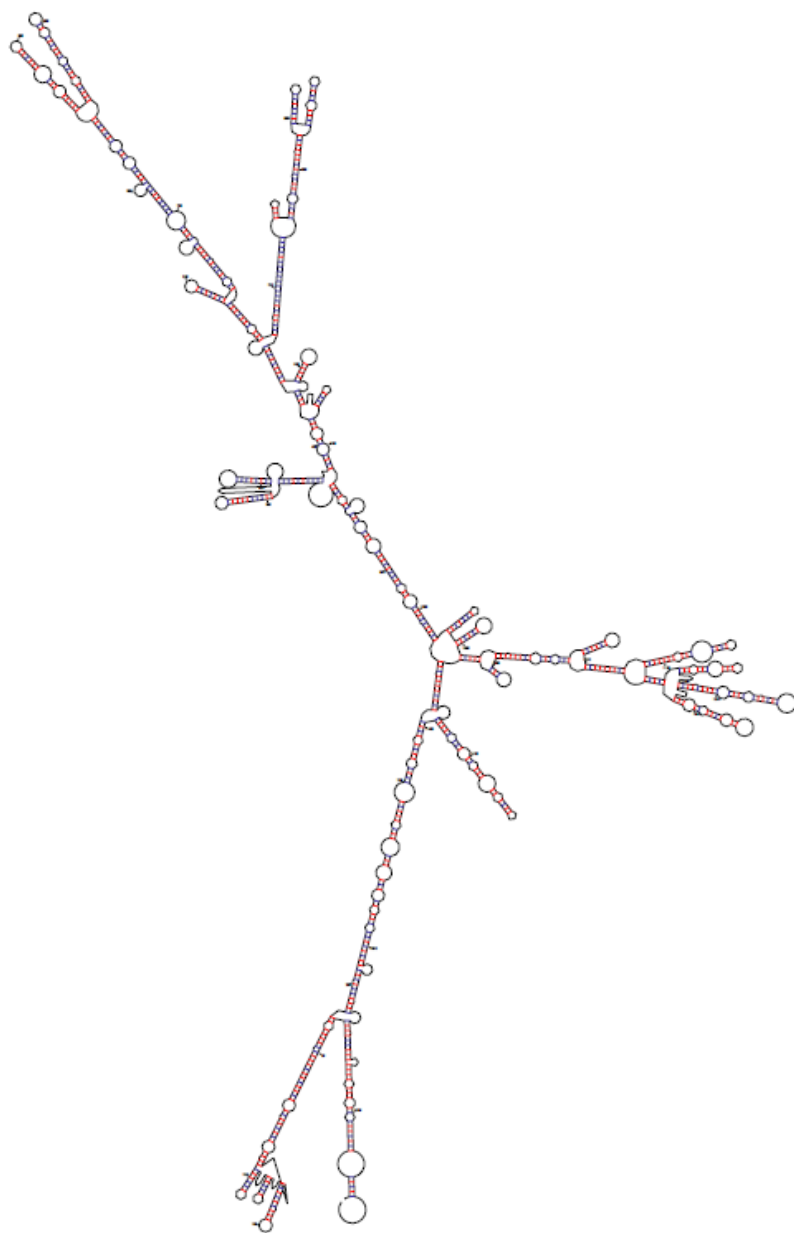

MEG3 fold structure

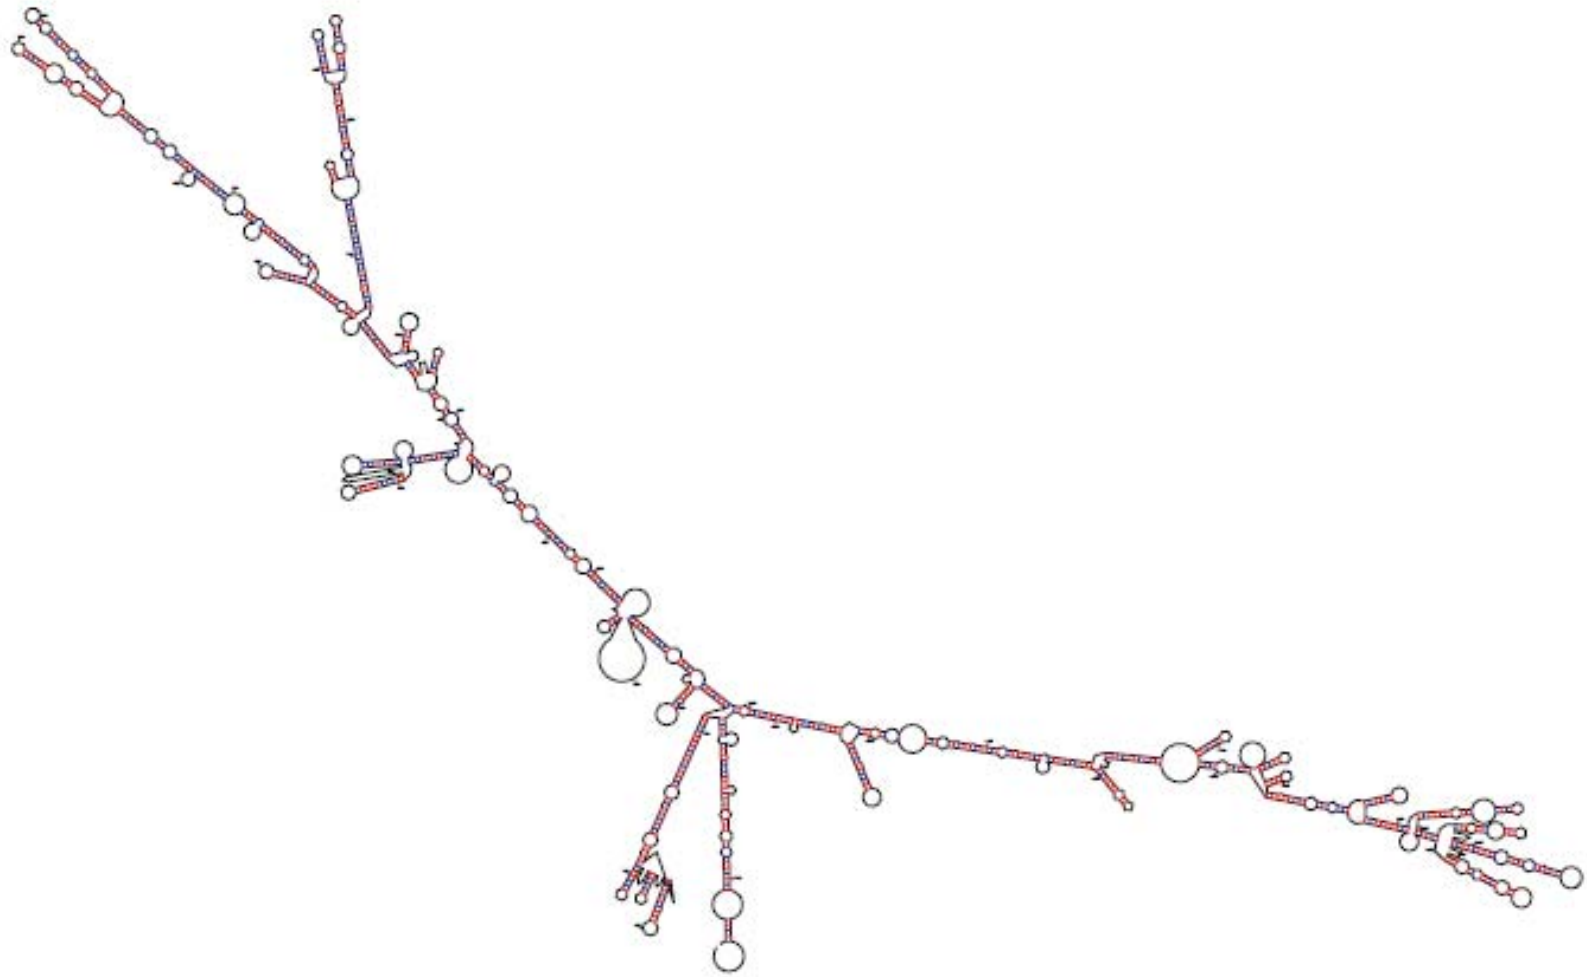

MEG3a fold structure

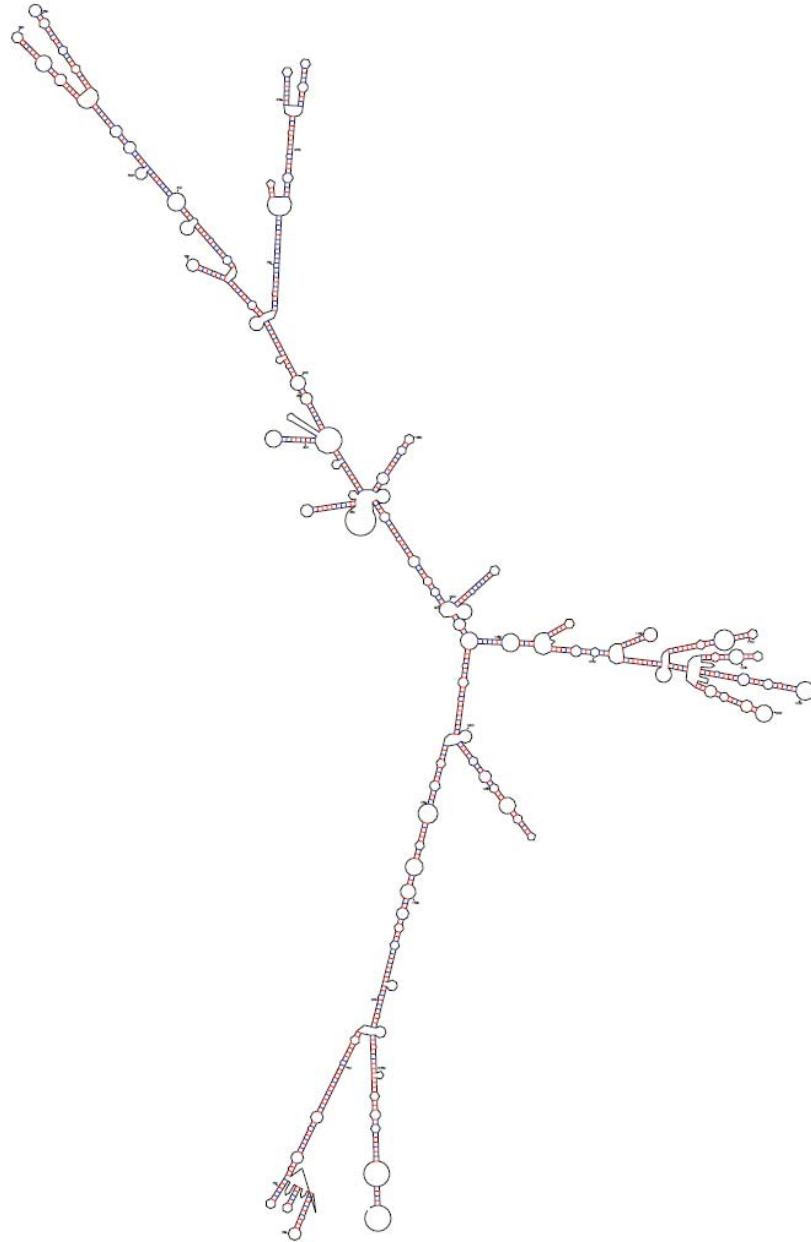

MEG3b fold structure

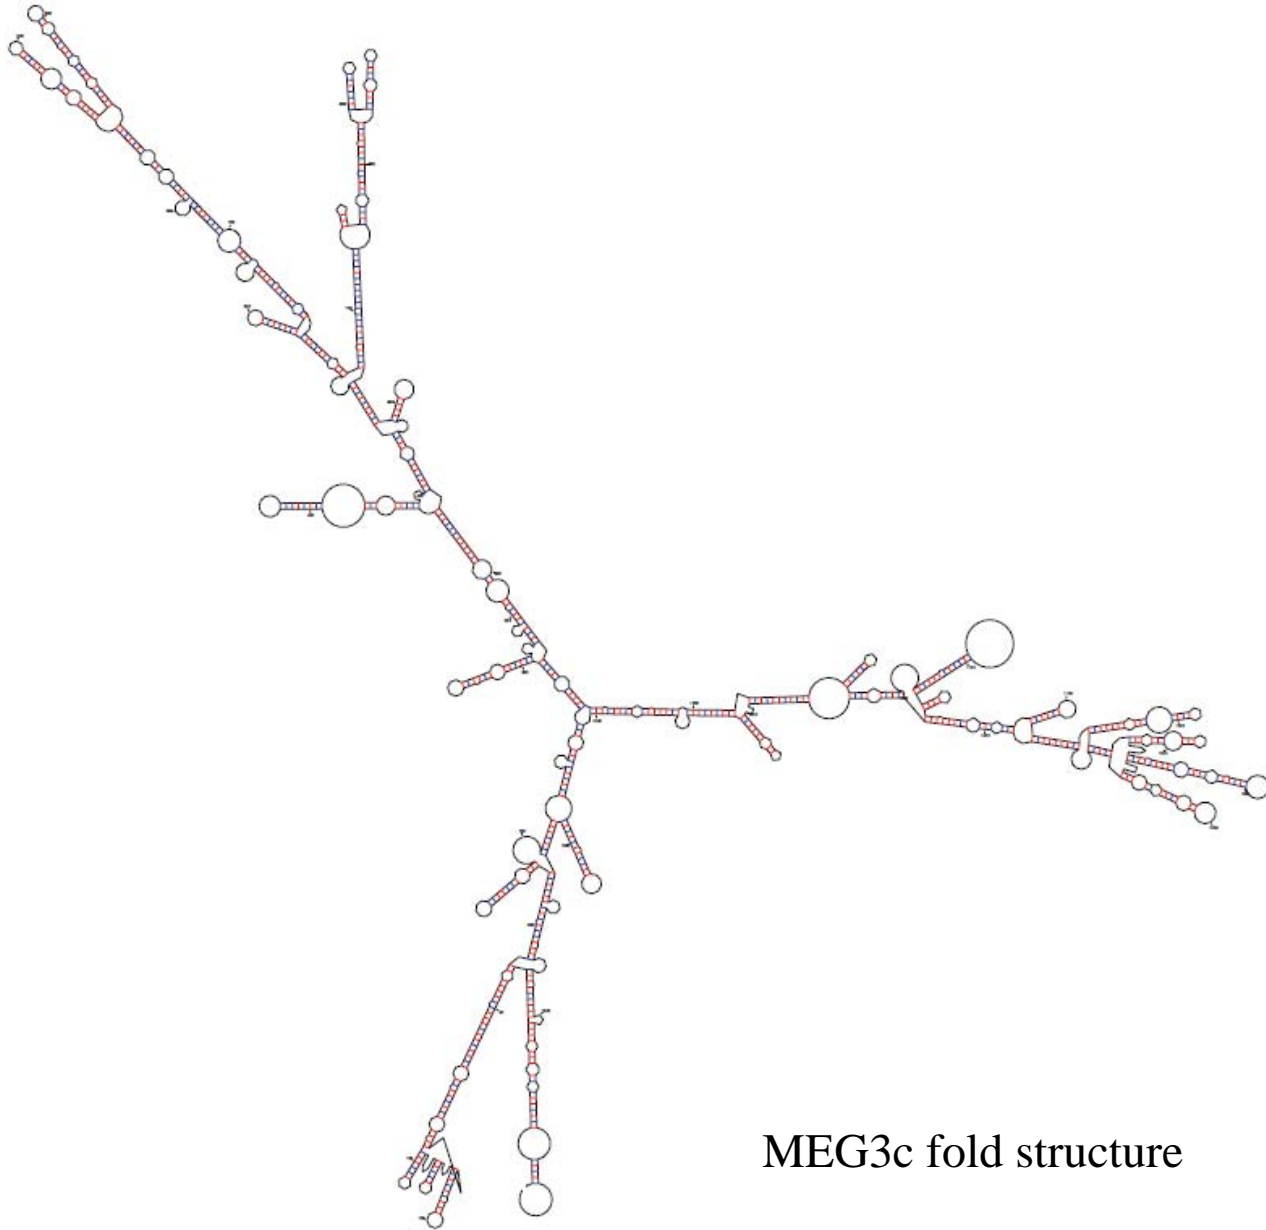

MEG3c fold structure

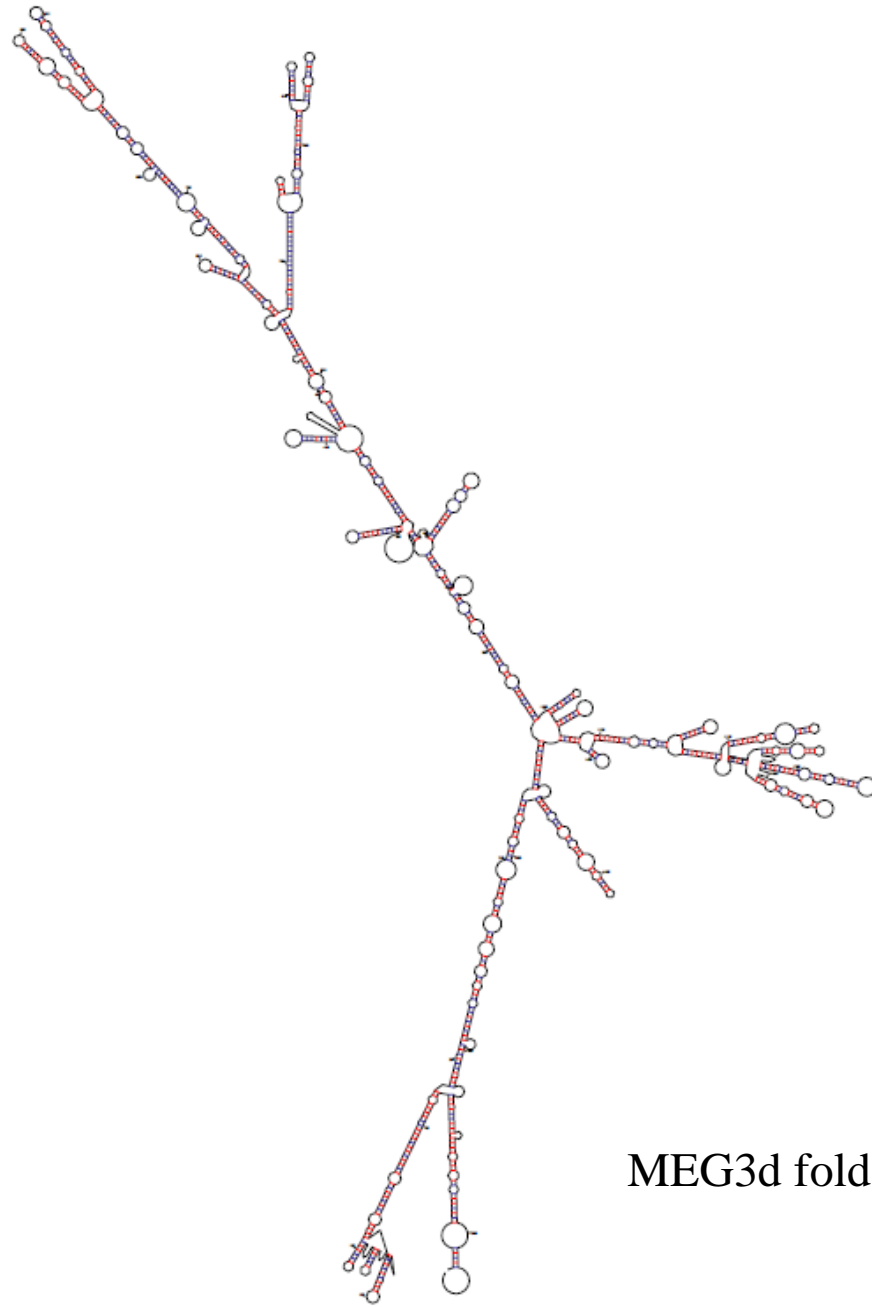

MEG3d fold structure

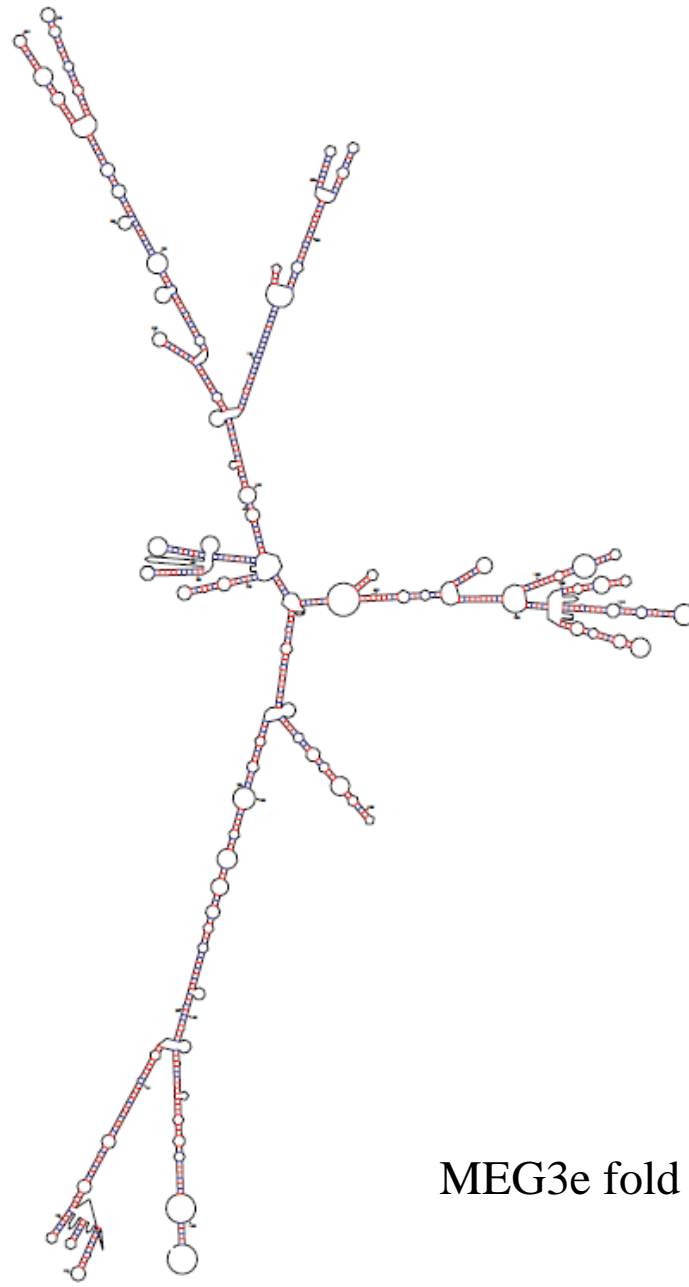

MEG3e fold structure

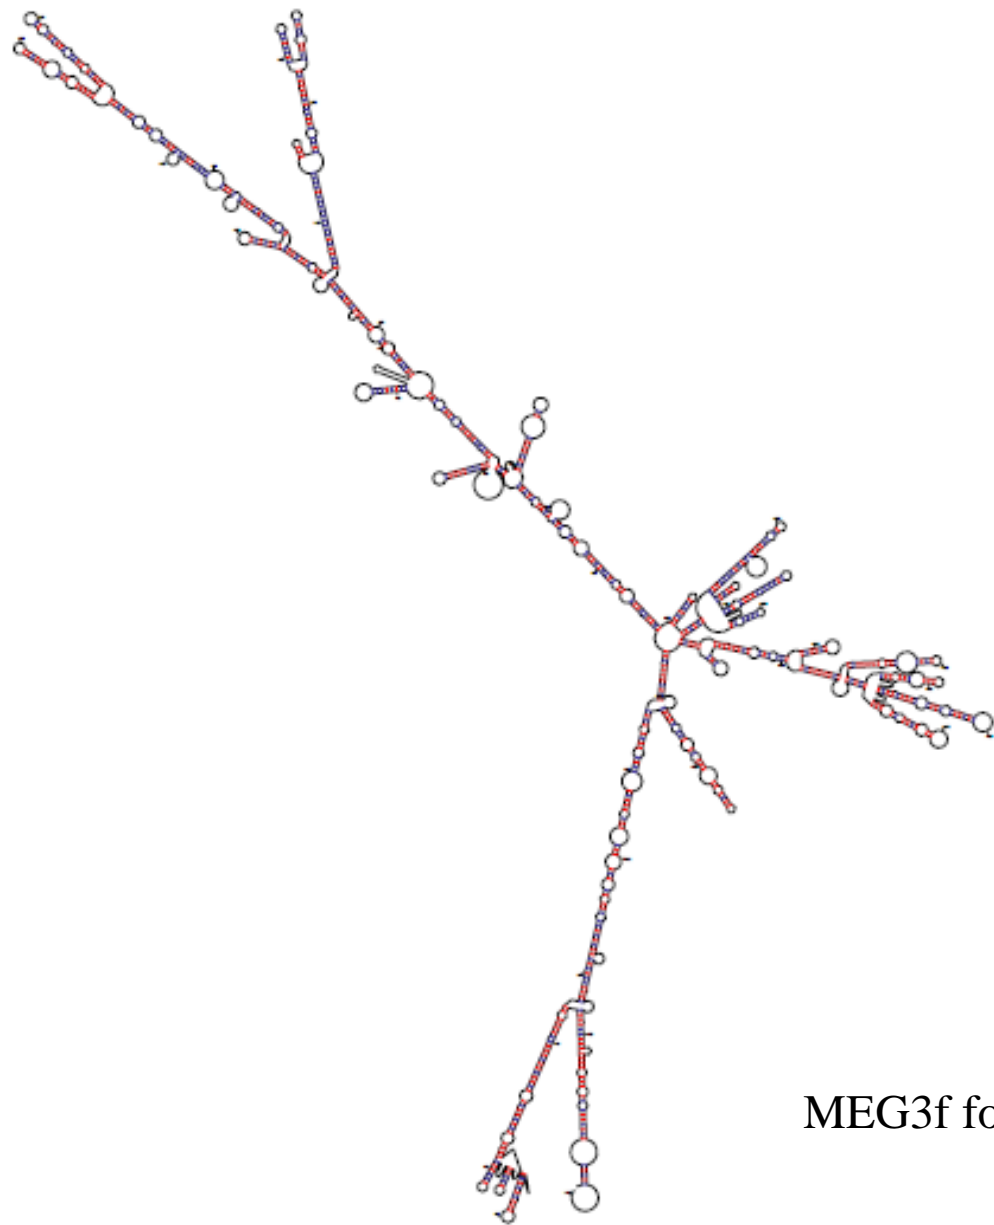

MEG3f fold structure

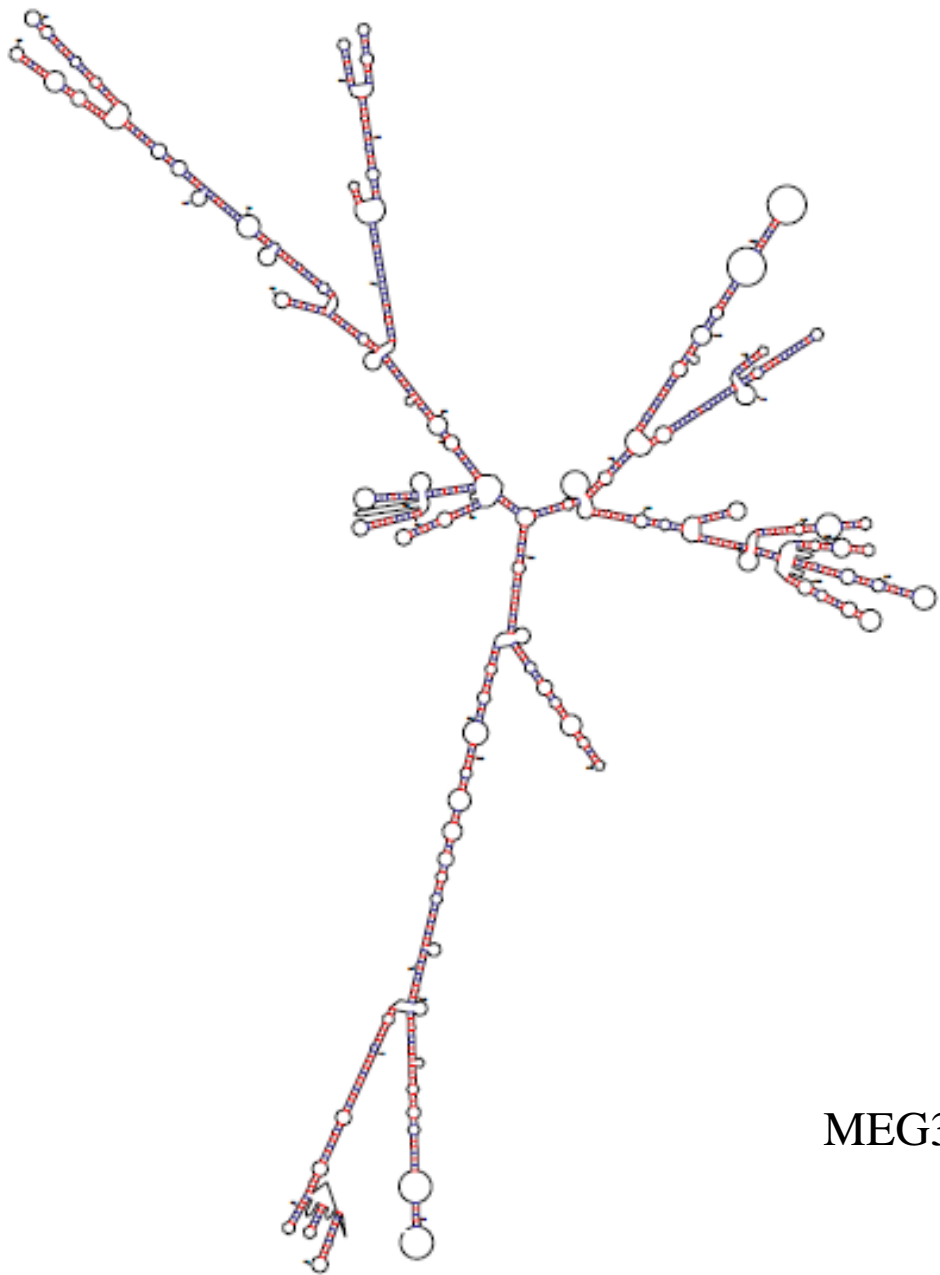

MEG3g fold structure



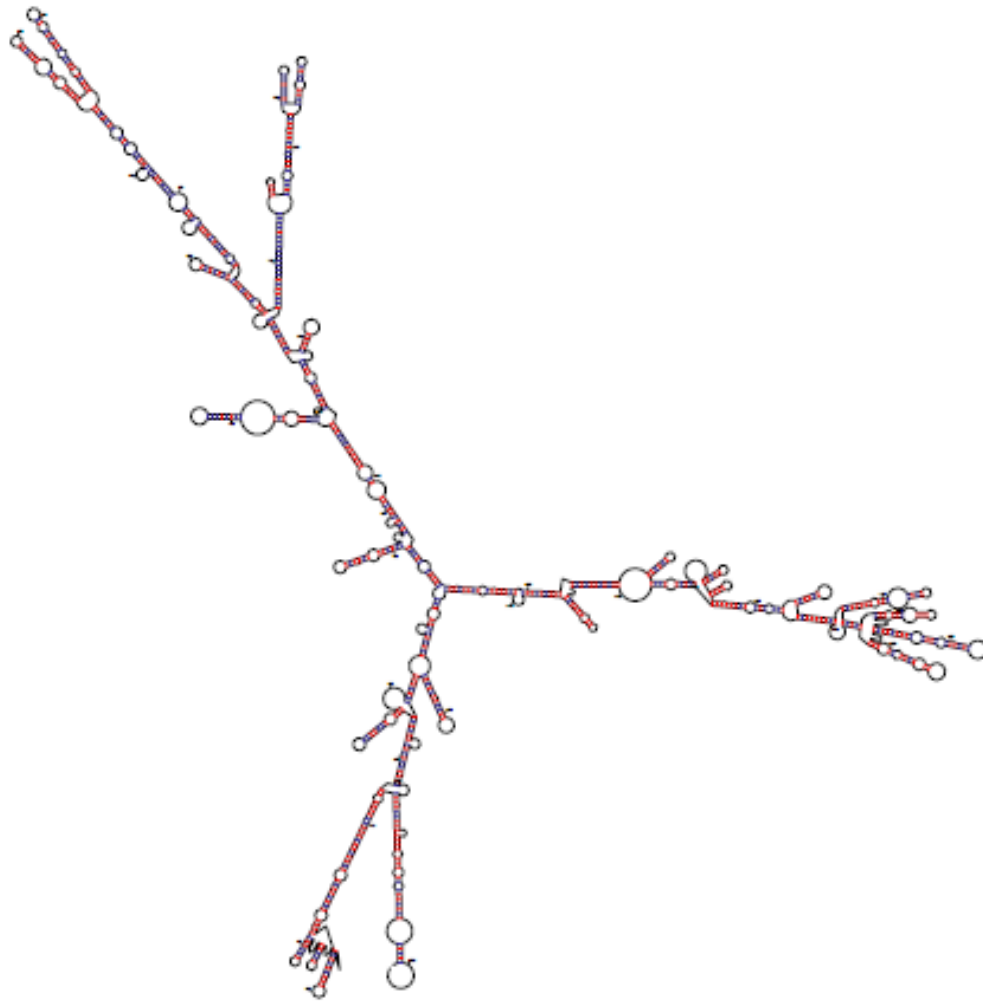

MEG3h fold structure

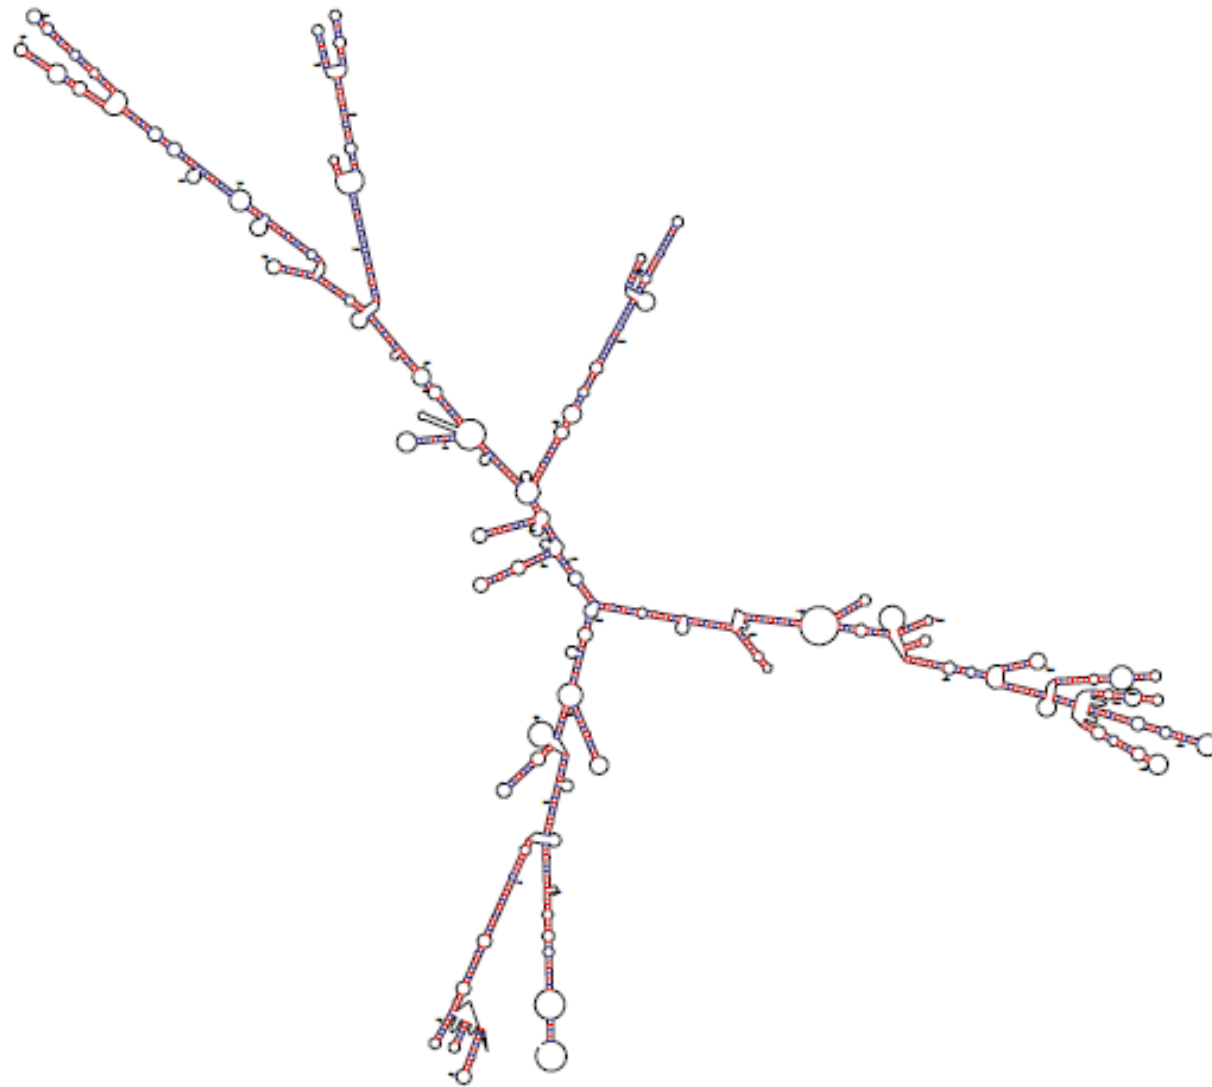

MEG3i fold structure

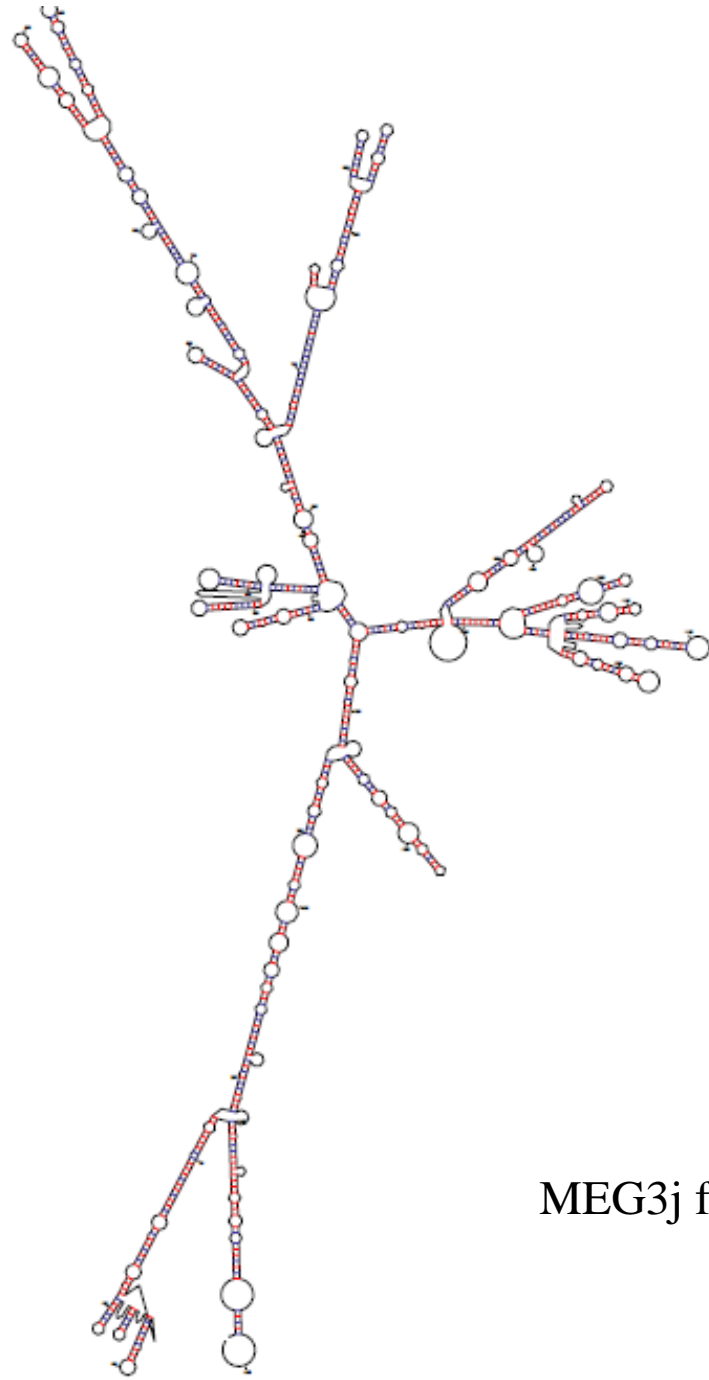

MEG3j fold structure

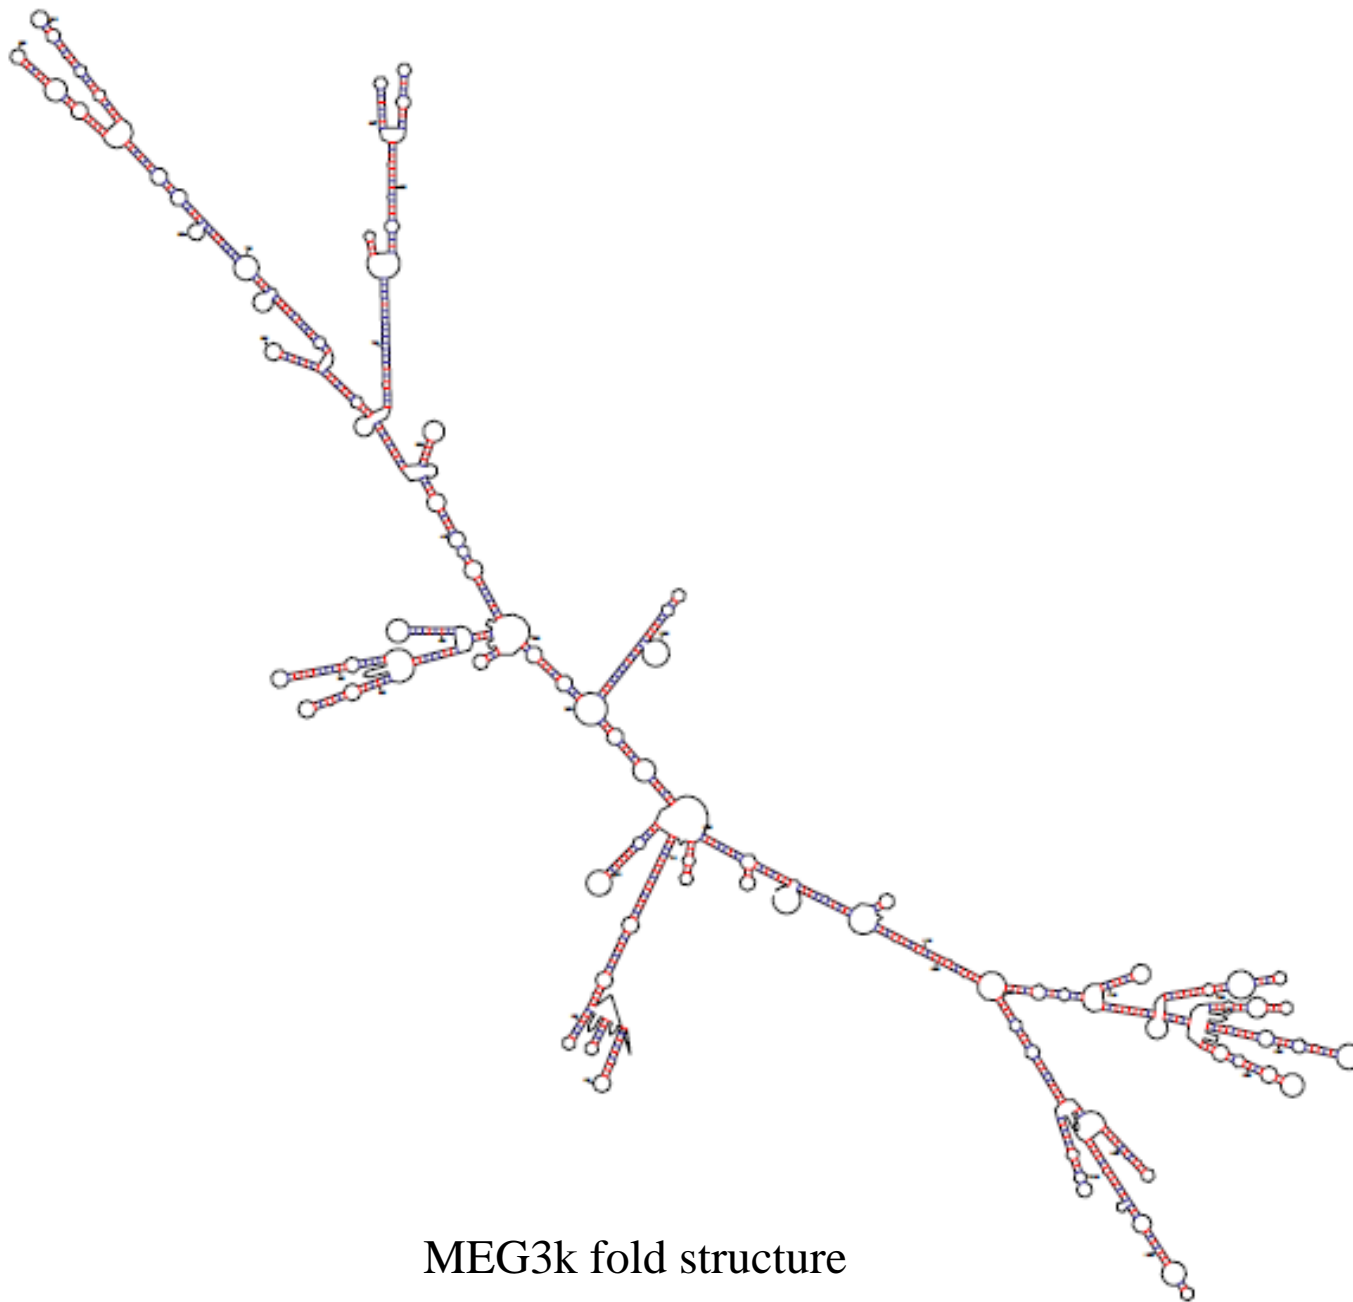

MEG3k fold structure
